# Supplementary material for: Fine-diameter microwave-absorbing SiC-based fiber
Source: Royal Society of Chemistry journal article supplement (doi:10.1039/c7ra00175d), 2017-01-01
Supplement: c7ra00175d1.pdf [file c7ra00175d1.pdf]

Electronic Supplementary Material (ESI) for RSC Advances.  
This journal is © The Royal Society of Chemistry 2016

## Supplementary Information

### Fine-Diameter Microwave-Absorbing SiC-based fiber

*Bowei Wang, Huimin Li, Limin Xu, Jiangxi Chen, Guomei He\**

*Key Laboratory of High Performance Ceramic Fibers of Ministry of Education,  
Department of Materials Science and Engineering, College of Materials, Xiamen  
University, 361005, China  
E-mail: [gmhe@xmu.edu.cn](mailto:gmhe@xmu.edu.cn)*

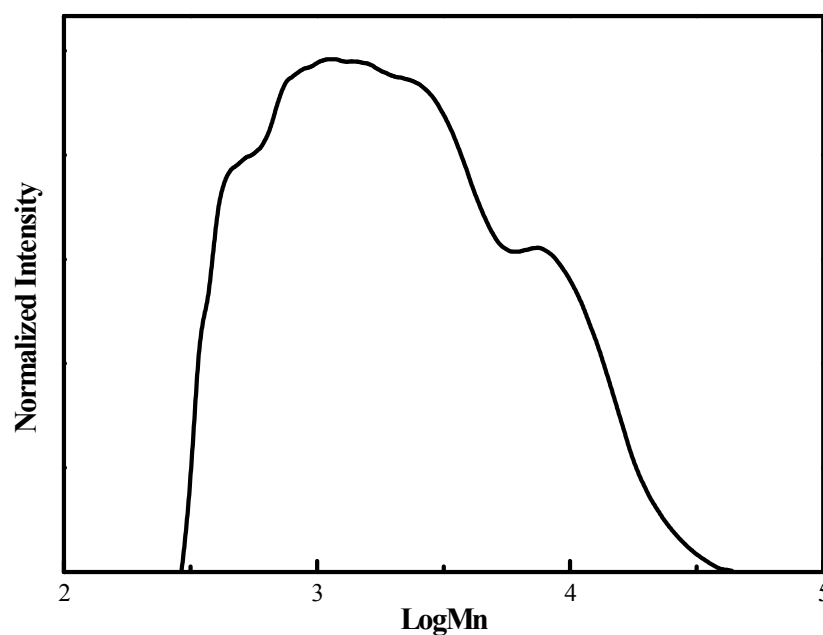

**Figure S1.** GPC trace curve of Si-C-Ti-B polymer.

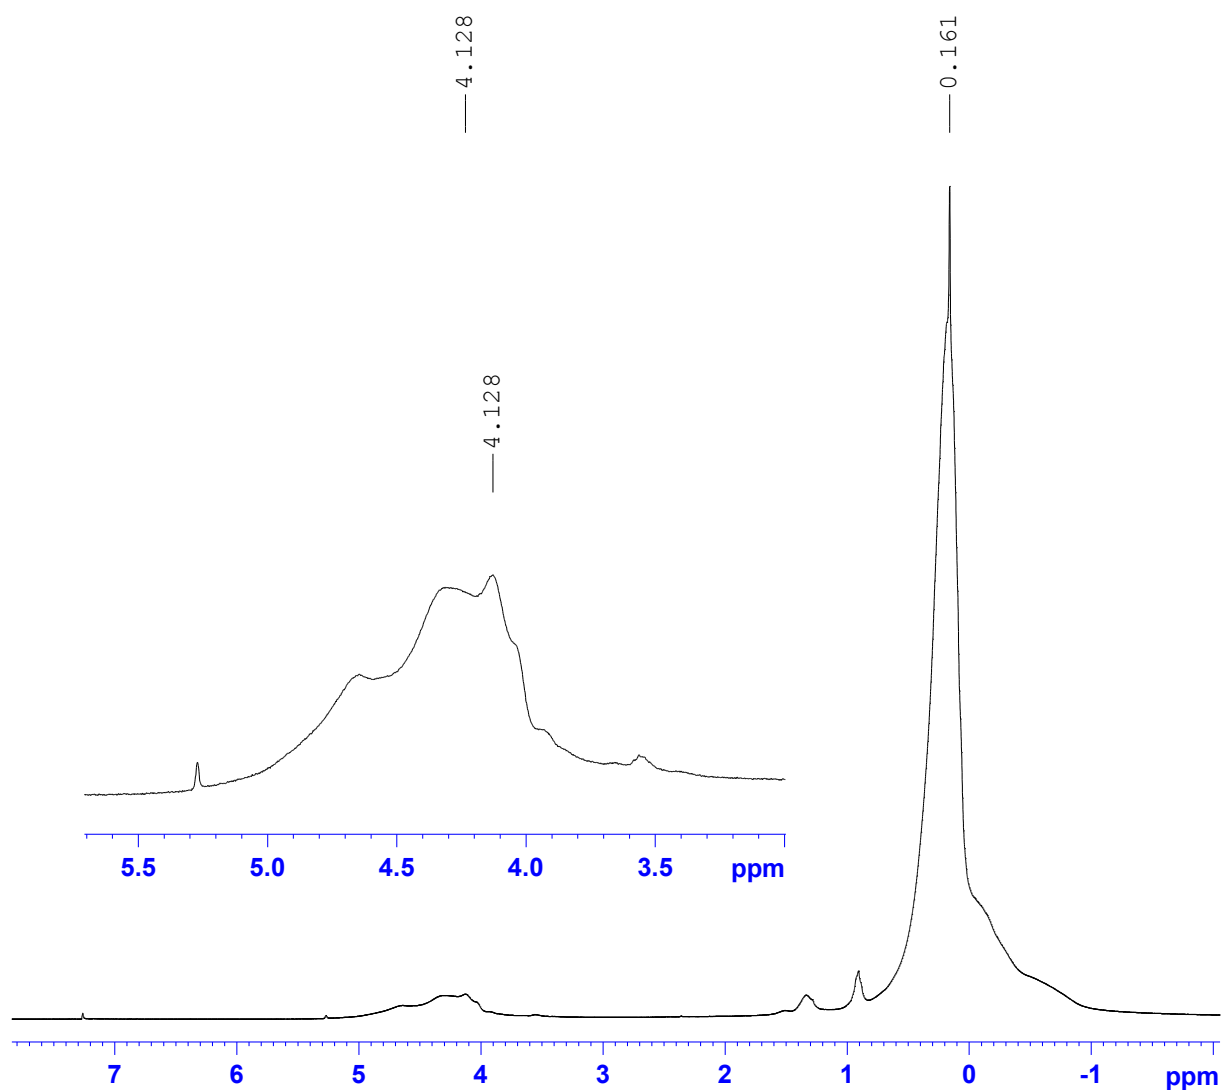

**Figure S2.**  $^1\text{H}$  NMR spectrum of Si-C-Ti-B polymer in  $\text{CDCl}_3$  at 300.13 MHz.

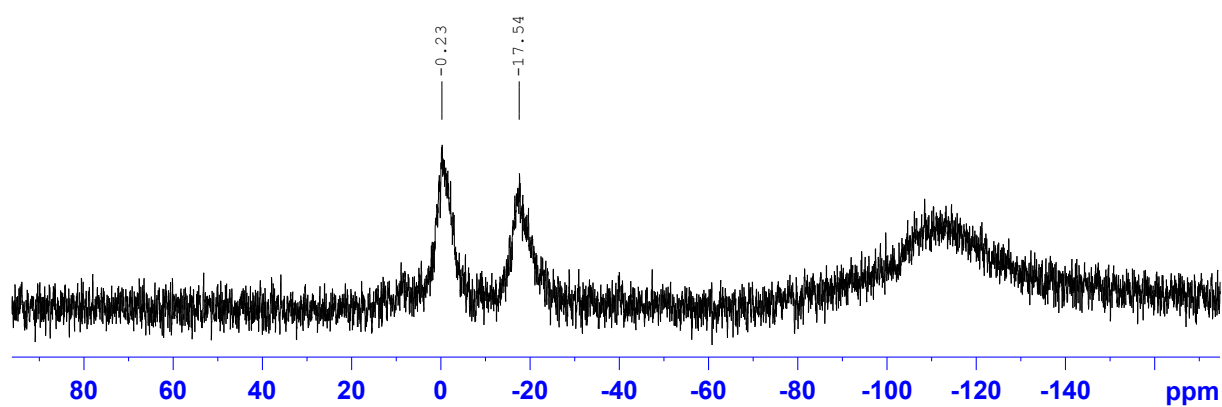

**Figure S3.**  $^{29}\text{Si}\{^1\text{H}\}$  NMR spectrum of Si-C-Ti-B polymer in  $\text{CDCl}_3$  at 59.63 MHz.

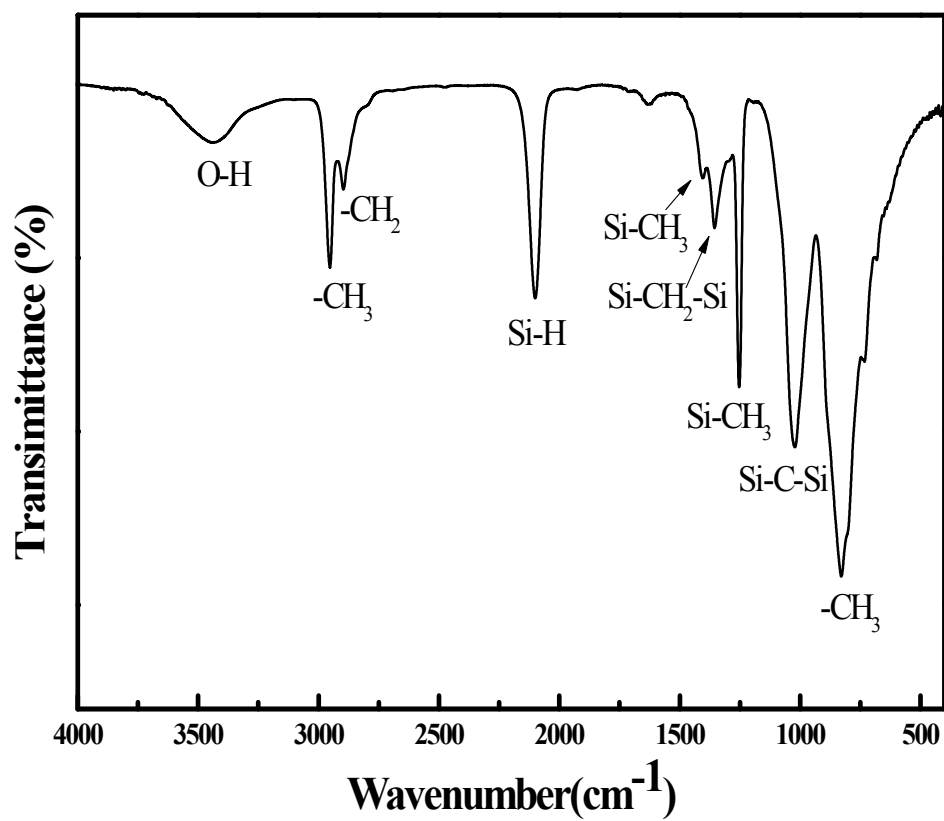

Figure S4. FT-IR spectrum of Si-C-Ti-B polymer.

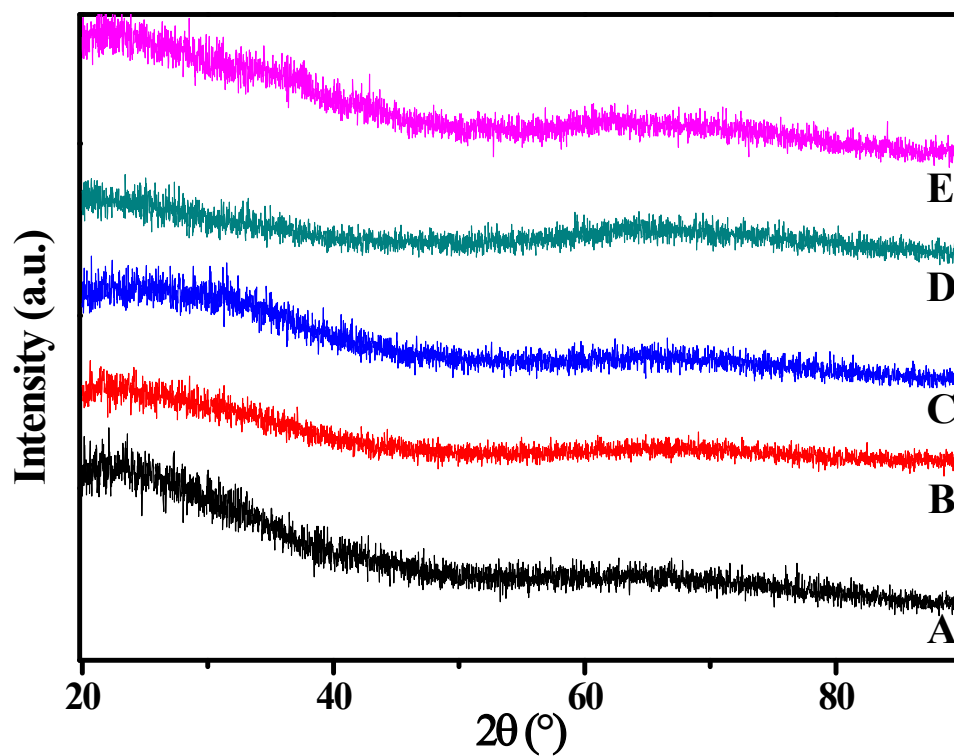

Figure S5. XRD spectra of the obtained ceramic fiber pyrolysed at (A) 900 °C, (B) 1000 °C, (C) 1100 °C, (D) 1200 °C, (E) 1300 °C.

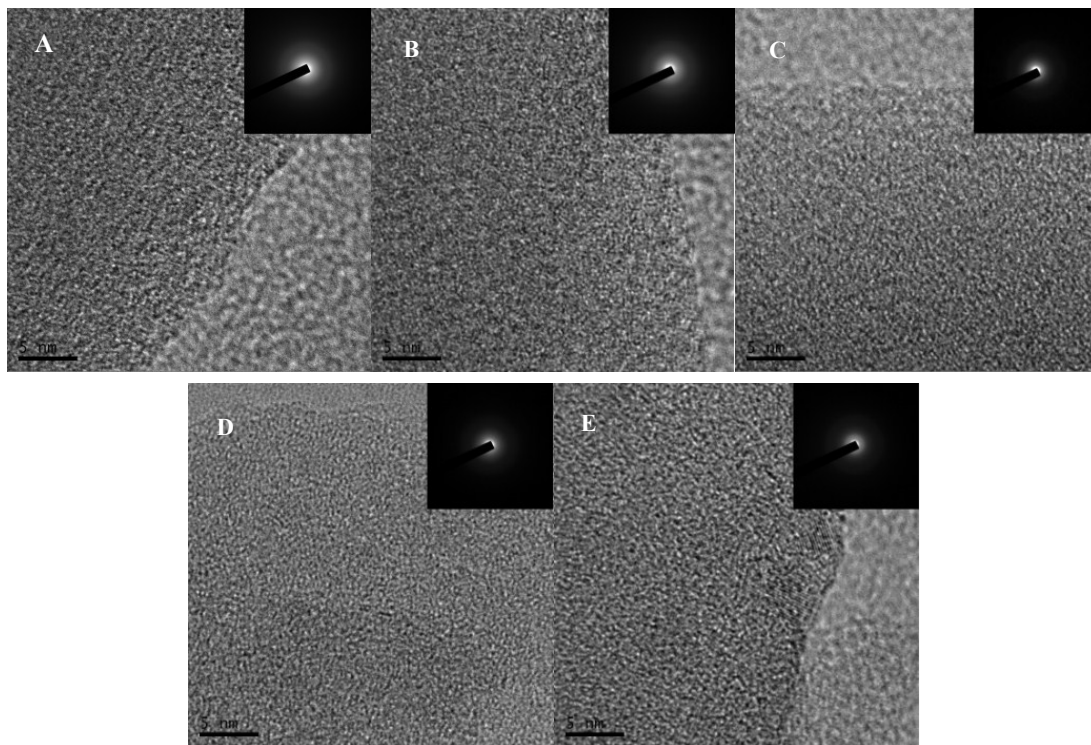

**Figure S6.** TEM Photos of the obtained ceramic fiber pyrolysed at (A) 900 °C, (B) 1000 °C, (C) 1100 °C, (D) 1200 °C, (E) 1300 °C.

**Table S1.** The chemical compositions of ceramic fiber pyrolysed at 900-1300 °C.

| temperature<br>(°C) | Si(%) | C(%)  | O(%)  | Ti(%) | B(%) |
|---------------------|-------|-------|-------|-------|------|
| 900                 | 50.41 | 19.77 | 27.32 | 0.62  | 0.73 |
| 1000                | 51.15 | 21.99 | 24.62 | 1.38  | 0.52 |
| 1100                | 52.55 | 21.40 | 23.56 | 1.38  | 0.62 |
| 1200                | 53.42 | 17.30 | 26.73 | 1.45  | 0.73 |
| 1300                | 51.00 | 22.12 | 24.24 | 1.52  | 0.82 |
